# Supplementary material for: Implementing Evidence-Based Interventions to Improve Vocational Recovery in Early Psychosis: A Quality-Improvement Report
Source: Atypon-hosted journal article supplement (doi:10.1176/appi.ps.201900342), 2021-07-08
Supplement: appi.ps.201900342.ds001.pdf [file appi.ps.201900342.ds001.pdf]

**Diagram. Enrollment of patients in QIC and RCT**

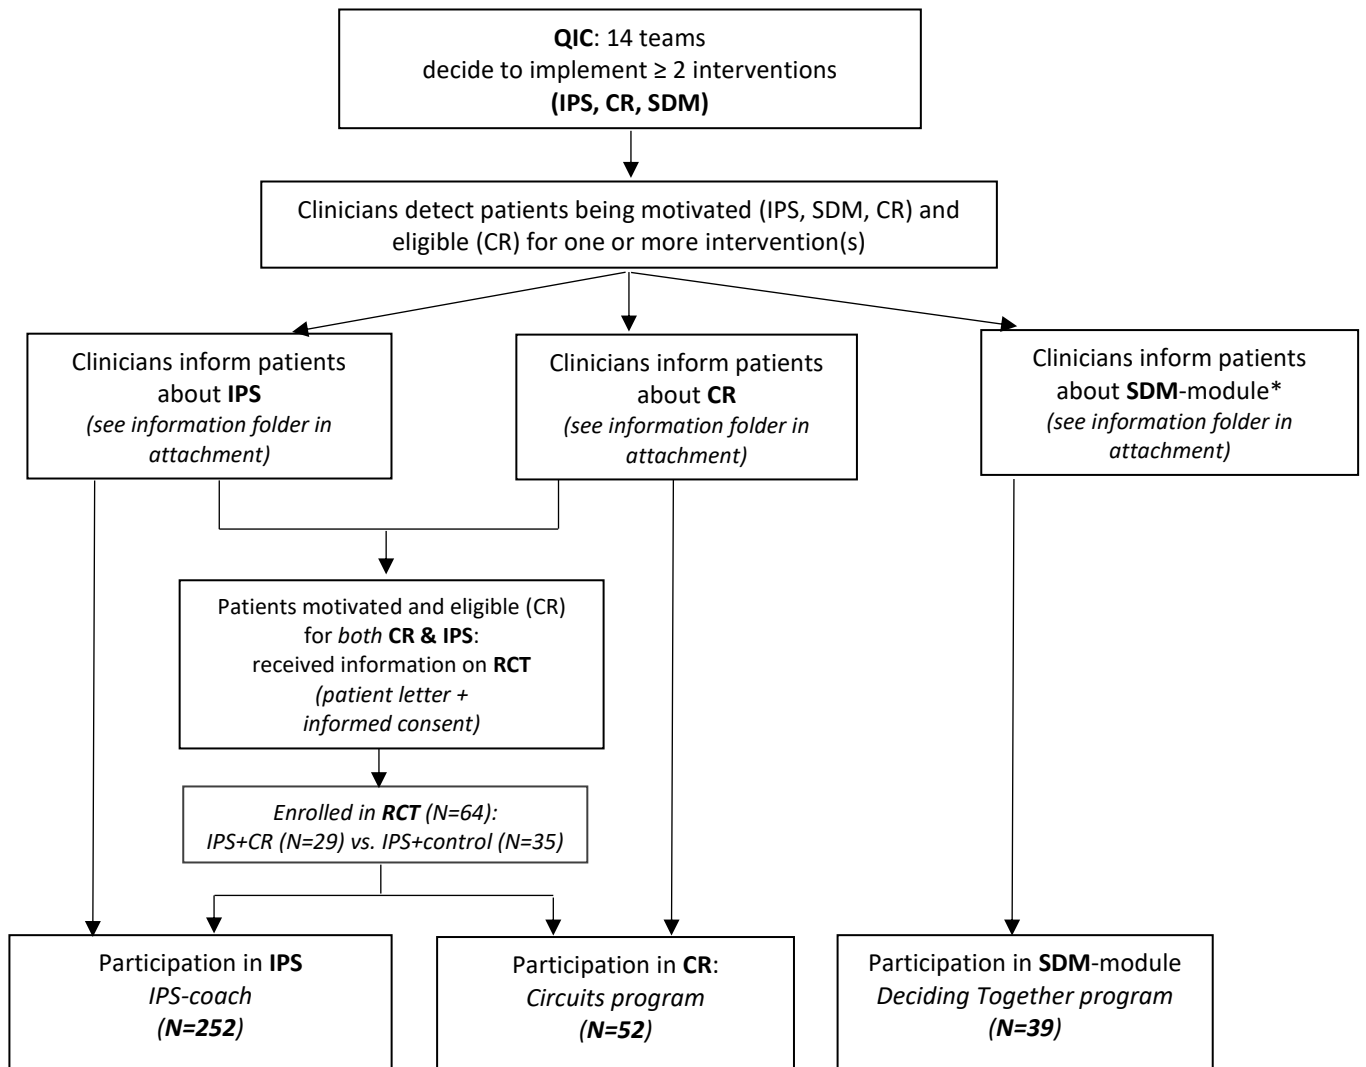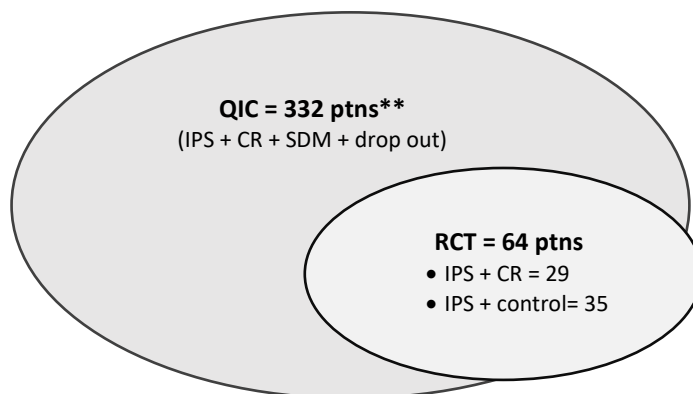

\* The SDM-module was not part of the comparison in the RCT.

\*\* Some ptns participated in more than 1 intervention, some ptns dropped out before actual participation.

## Attachment Diagram - Information Folders IPS, CR and SDM

### Information Folder - IPS

Phrenos  
Tribos Instituut

Naar opleiding of betaald werk  
Methode Individuele Plaatsing en Steun

De methode Individuele Plaatsing en Steun (IPS) is een methode waarbij je wordt ondersteund om weer een opleiding te gaan volgen of om baan te vinden. Er wordt goed gekeken naar waar jij wilt en kunt. Tegelijkertijd aan de hand van de methode is dat je alereen gaan kunnen met de opleiding of baan die bij je past en die van daarna wordt gericht in bepaalde vaardigheden om ermeer door te kunnen gaan.

Er zijn verschillende trajecten mogelijk: een opleiding volgen of betaald werk vinden of een combinatie van beide.

**Opleiding**  
Oftewel: dan te kunnen maken op de arbeidsmarkt is het belangrijk dat je een diploma hebt. Misschien was je al bezig met een opleiding voordat je psychiatrische problemen kreeg en wilt je weer mee deze opleiding verder gaan of je wilt juist een andere opleiding gaan volgen. De IPS-consulent zal jou helpen om uit te zoeken welke opleiding bij je past en je ondersteunen om met deze opleiding te beginnen. Hetzij je de opleiding volgt, emenging je, ah het nodig is, hulp bij dingen waar je tegenaan loopt, zodat je kunt blijven leren of studeren.

**Betaald werk**  
Voor veel mensen is werken belangrijk om zich goed te voelen. Een baan brengt veel voordelen met zich mee, zoals contact met anderen en sociale contacten. Bij IPS wordt je ondersteund in het zoeken naar een betaalde baan die aansluit bij je wensen, het kan gaan om een parttime of fulltime baan waaraan je een maximaal bedrag kunt verdienen.

Het principe van IPS is om eerst uit te zoeken wat je wensen zijn en waar je goed in bent, vervolgens de juiste baan te zoeken en te solliciteren. Je hoeft niet eerst een training te volgen. Er wordt geboden om baan te vinden die je leuk vindt en die bij jou past. Het gaat om gewone banen, dus geen special gerehabiliteerde banen, sociale werkplaatsvoorzieningen of vrijwilligerswerk.

**Als je een baan hebt gevonden, krijg je de ondersteuning die jij graag wilt, je kunt altijd contact opnemen met de IPS-consulent als je terugdraagt informatie die het werk je kunt bijvoordel bezorgen wat je wilt of met wie verhoort over je praktische problemen. De IPS-consulent heeft daardoor informatie beschikbaar.**

De IPS-consulent zal, als het nodig is en je dat wilt, ook spreken op de werkplek aanwezig zijn en jou en de werkgever ondersteuning bieden. Het is een onderdeel van de werkwijze samen met jou uit te zoeken hoe je dat moet regelen.

**Onderzoek**  
Kenniscentrum Phrenos en het Tribos Instituut onderzoeken wat de effecten zijn van Cognitieve Training als aanvulling op IPS. Daarom wordt aan mensen die IPS volgen en meedoen aan het onderzoek naar Cognitieve Training gevraagd of ze op drie momenten (na 4, 8 en 12 maanden) een vragenlijst willen invullen. Deelname aan dit onderzoek is niet verplicht. Meer informatie hierover vind je in de informatiebrief over het onderzoek.

**Meer weten?**  
Wil je meer weten over IPS? Vraag het aan de contactpersoon binnen jouw organisatie.

### Information Folder – CR: Circuits program

Phrenos  
Tribos Instituut

Herken je dit?  
Doe dan mee aan de Cognitieve Training  
Een training van je brein

Het gevoel dat je herkennen niet meewerken...  
Moeilijk je aandacht erbij houden...  
Afspraken vergeten...

**Cognitieve Training**  
De Cognitieve Training, ook wel cognitieve revalidatie genoemd, houdt in dat je met een computerprogramma verschillende oefeningen doet om je brein te trainen. We trainen vaardigheden zoals geheugen, aandacht en het switchen tussen verschillende onderwerpen. De oefeningen worden zo aangepast dat ze aansluiten bij jouw niveau.

**Hoe ziet de training eruit?**  
Je gaat drie maal per week aan de slag met de computertraining. Hoe lang een sessie duurt, hangt af van jouw eigen niveau. Het kan een uur tot twee uur duren. Hoe beter het gaat, hoe langer een oefening wordt, je kunt allerlei vaardigheden die je in het gewone leven nodig hebt, in een sessie van 45 minuten, ook krijgen je huterwerk mee, zodat je de vaardigheden blijft oefenen en er steeds beter in wordt.

**Ik kan nu beter een boek lezen, maar ik heb moeite om mijn aandacht te houden. Twee keer lezen omdat ik vergat wat er stond.**

**Begleiding**  
Bij het oefenen van de vaardigheden krijg je begeleiding van een therapeut. De therapeut is elke week bij één sessie aanwezig. De tweede sessie bespreekt hetgeen je in de voor- of na. De derde sessie voor je zelfstandig uit.

**Onderzoek**  
Kenniscentrum Phrenos en het Tribos Instituut onderzoeken wat de effecten zijn van de Cognitieve Training. Daarom wordt aan alle mensen die de training volgen gevraagd of ze op drie momenten een vragenlijst willen invullen. Deelname aan dit onderzoek is niet verplicht. Meer informatie hierover vind je in de brief over het onderzoek.

**Is onderdeel de beschrijving van een vraag, waarvan ik werk nu veel beter.**

**Meer weten?**  
Wil je meer weten over de Cognitieve Training? Vraag het aan de contactpersoon binnen jouw organisatie.

### Information Folder - SDM: program Deciding Together [Samen Keuzes Maken]

Phrenos  
Tribos Instituut

Methode Samen Keuzes Maken  
Voor een gezamenlijke invulling van de behandeling

Wat wil ik bereiken?  
Wat kan ik zelf doen?  
Wat wil ik invullen om dat mijn behoeftes te zijn?  
Wat kan ik doen?  
Wat kunnen anderen voor mij doen?

**Samen Keuzes Maken (SDM)** is een methode die je ondersteunt om goed voorbereid het gesprek met een hulpverlener in te gaan, zodat je samen tot een goede invulling van de behandeling kunt komen. De methode geeft je informatie om zorgvuldig keuzes te kunnen maken, bijvoorbeeld over medicatie.

**De methode Samen Keuzes Maken**  
Samen Keuzes Maken (SDM) is een methode die je ondersteunt om goed voorbereid het gesprek met een hulpverlener in te gaan, zodat je samen tot een goede invulling van de behandeling kunt komen. De methode geeft je informatie om zorgvuldig keuzes te kunnen maken, bijvoorbeeld over medicatie.

**Wie doet het programma eruit?**  
Je krijgt online toegang tot SAM. Eerst ga je aan hoe tevreden je bent over verschillende dingen in je leven, je keert met welke bevestigingen je aan de slag wilt en formulieren die je moet invullen. Op de website staat over de verschillende bevestigingen informatie die je daarbij kunt gebruiken. Ook kan je ervaringsverhalen lezen en filmpjes bekijken van andere deelnemers.

Verder is er een uitgebreide medicatiehandleiding waarin je meer kunt lezen over de voor- en nadelen van langwerkende of kortwerkende medicatie. Zo kun je een weloverwogen keuze maken samen met je hulpverlener.

Voor elk gevraagd doel beschreef je de volgende vragen:  
• welke ondersteuning heb ik nodig om mijn doel te bereiken?  
• Wat kan ik zelf doen?  
• Wat kunnen anderen doen om mij te ondersteunen (bv. familie of vrienden, hulpverlening, ervaringsdeskundigen)?  
• Hoe ziet mijn planning eruit?

Je bespreekt zelf met wie je deze doelen wilt bespreken.

**Meer weten?**  
Wil je meer weten over SAM? Vraag het aan de contactpersoon binnen jouw organisatie.

Implementing evidence-based interventions to improve vocational recovery in early psychosis

Timeline. Early Psychosis QIC including RCT (comparing IPS+CR vs IPS+control)

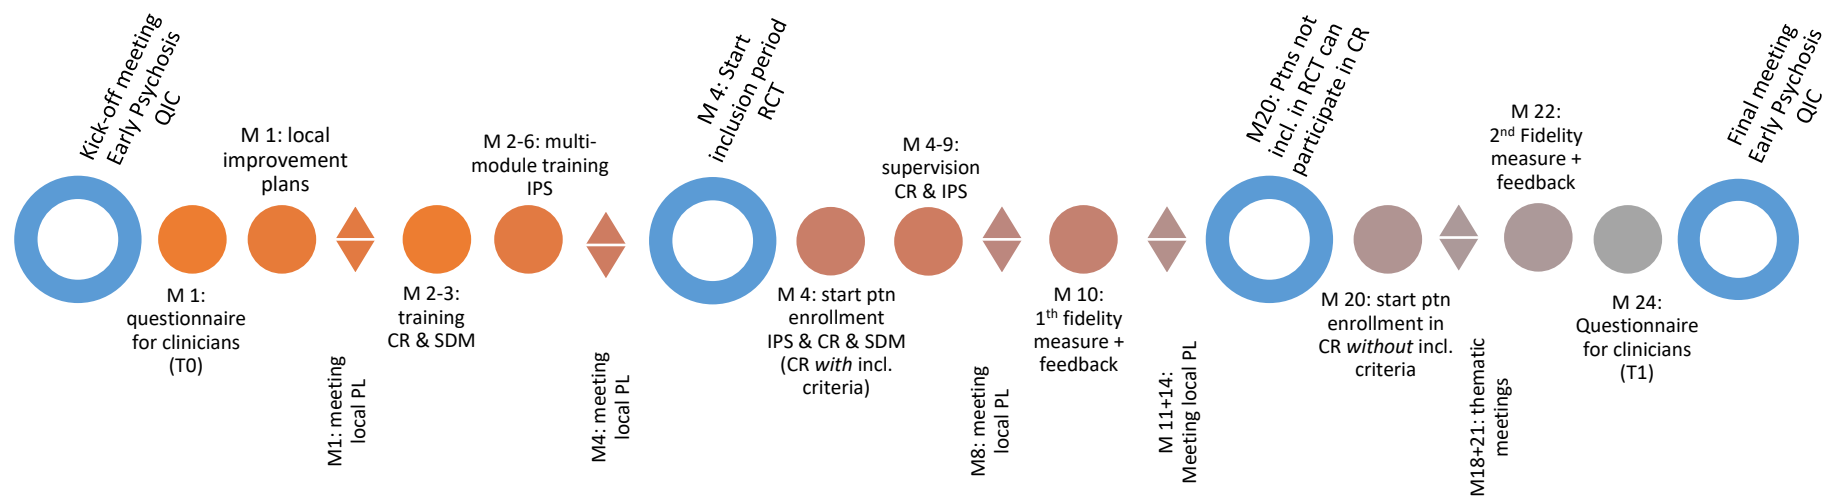

**Box - Computerized program shared decision-making (SDM)**

**Deciding Together Program**

‘Deciding Together’ is a computerized program *to facilitate* shared decision-making. It was developed after an example of Patricia Deegan (2010). The program, among other things, contains information on recovery and support to achieve recovery.

The screenshot shows the 'Mijn portaal' (My portal) section of the website. It features four main cards: 'Informatie levensdomeinen', 'Over medicatie', 'Informatieve links', and 'Ervaringsverhalen'. Below these is a table of 'Uw vragenlijsten' (Your questionnaires) and a 'Beschikbare vragenlijsten' (Available questionnaires) section.

Callout boxes on the right side of the image point to the following features:

- Information on life areas (points to 'Informatie levensdomeinen')
- Information on medication (points to 'Over medicatie')
- Links to further information (points to 'Informatieve links')
- Recovery stories (points to 'Ervaringsverhalen')
- Questionnaires being completed (points to the 'Uw vragenlijsten' table)

In addition, **short movies** are included with stories of recovery from expert users.

The screenshot shows the 'Bekijk herstelverhalen' (View recovery stories) page. It features a navigation bar with names: 'Suzan', 'Martijn', 'Madeleine', 'Maurice', and 'Annemiek'. The main content area displays a video player for 'Suzan' and a text block titled 'Wat is herstel' (What is recovery).

Callout boxes on the right side of the image point to the following features:

- Recovery stories of peers (points to the video player and text block)

Central in the module is a questionnaire that can be completed by service users to **prepare the consult** with their therapist. **The questionnaire** helps patients to evaluate their expectations and satisfaction on several areas in daily life, like: psychological wellbeing, leisure activities, social relationships, work and education and medication use.

The screenshot shows the 'SamenKeuzesMaken.nl' website interface. The main heading is 'Tevredenheids levensdomeinen 2' (Satisfaction life domains 2). Below this, there are several sections, each with a horizontal slider from 'Niet tevreden' (Not satisfied) to 'Zeer tevreden' (Very satisfied). The sections are: 'Sociale contacten' (Social contacts), 'Vrije tijd besteding' (Leisure time use), 'Opleiding' (Education), 'Werk' (Work), 'Herstel' (Recovery), 'Lichamelijke gezondheid' (Physical health), 'Psychische gezondheid' (Psychological health), and 'Medicatie' (Medication). Each slider has a small blue square indicating the current satisfaction level. To the right of the screenshot, there are blue callout boxes with white text, each connected to a specific section of the questionnaire by a blue line. The callouts are: 'Satisfaction on life areas' (pointing to the overall heading), 'Social Relationships' (pointing to 'Sociale contacten'), 'Leisure activities' (pointing to 'Vrije tijd besteding'), 'Work and education' (pointing to 'Opleiding'), 'Physical health' (pointing to 'Lichamelijke gezondheid'), 'Psychological health' (pointing to 'Psychische gezondheid'), and 'Medication' (pointing to 'Medicatie').

The questionnaire helps to **formulate goals** in these life areas, which can be discussed with the clinician. The client and clinician can decide together which strategies and treatment options will be used to achieve these goals.

The screenshot shows two sections of the questionnaire. The top section is titled 'In-depth questions' and contains two numbered questions. Question 1 asks: '1. Wat doe je momenteel als het gaat om betaald of onbetaald werk? Voel je je hier prettig bij?' (What are you currently doing regarding paid or unpaid work? Do you feel comfortable with it?). Question 2 asks: '2. Wat heb je gedaan in het verleden als het gaat om werk, school, vrijwilligerswerk, trainingen en cursussen. Hoe lang, wanneer, waar? Wat vond je leuk en wat absoluut niet?' (What have you done in the past regarding work, school, volunteer work, training and courses. How long, when, where? What did you like and what absolutely not?). The bottom section is titled 'Formulating goals' and contains a question: 'Met welk doel wil je als eerste aan de slag? Je kunt een doel/stelling die hierboven staat hieronder neerzetten, maar je mag hem ook zelf formuleren. Als je nog meer aanvullende informatie nodig hebt voordat je een doel kan formuleren, kun je op het icoon "aanvullende informatie" meer informatie vinden over het levensdomein werk.' (With which goal do you want to start first? You can set a goal/statement that is listed above here, but you can also formulate it yourself. If you still need more supplementary information before you can formulate a goal, you can click on the icon "supplementary information" to find more information about the life domain work.). Below the question is a text input field. At the bottom of the section, there are two green buttons: 'Vorige' (Previous) and 'Volgende' (Next).

Implementing evidence-based interventions to improve vocational recovery in early psychosis

When the goals are formulated, the questionnaire helps to decide on possible **further actions** that can be helpful to make a shared decision on treatment options, like: what further information do you need, with who do you want to discuss this questions, with who do you want to discuss your decision?

**Toelichting**

gewoon nog is even over praten met jou

Met wie wil je deze vragen bespreken?

- Ervarensdeskundige
- Iemand uit mijn steunsysteem (vrienden, kennissen, familie)
- Een professional (psychiater, psycholoog of andere hulpverlener)

Welke informatie heb je nodig?

- Geen
- Ik weet het nog niet
- Ik ben de volgende informatie nodig:

Met wie zou je graag over je keuze willen praten:

- Ervarensdeskundige
- Iemand uit mijn steunsysteem (vrienden, kennissen, familie)
- Een professional (psychiater, psycholoog of andere hulpverlener)

Vorige      Afronden

Finally, the client can **monitor his or her progress** on the goals that were formulated.

**GGZ** Noord-Holland-Noord

Ingelogd als: Janine Jansen

Vragenlijst: Mijn herstel → Afsluiting

### Vragenlijst: Mijn herstel

**Wat mij goed doet**

Een goede moeder zijn is het belangrijkste in mijn leven. Ik wil niet dat de symptomen van schizofrenie of bijeffecten van medicijnen effect hebben op mijn kinderen. We moeten samen zoeken naar een manier zodat ik goed voor mijn kinderen kan zorgen.

**Waar ik mij aan vast houd**

| Personal medicine            | Gebruikt u dit? |
|------------------------------|-----------------|
| 1. Wandelen in de natuur     | Ja              |
| 2. Voor mijn kinderen zorgen | Ja              |
| 3. ...                       | Soms            |

**Hoe ik mij voel**

| Verantwoordelijkheid nemen     | Eer bez |
|--------------------------------|---------|
| Verantwoordelijkheid nemen     | 5       |
| Lichamelijke gezondheid        | 2       |
| Mentale gezondheid             | 2       |
| Huis                           | 3       |
| Oevangenis/ Ziekenhuis/ anders | Ja      |
| Drugs/ Alcohol                 | 5       |
| AH/VH                          | 3       |
| Weinig energie                 | 3       |
| Teveel energie                 | 3       |
| Waanbeelden/ angsten           | 3       |
| Concentratie                   | 4       |
| Razende gedachten              | 2       |
| Faalangst                      | 4       |

Verloop van de laatste metingen.

**Bespreking**

| Bespreken                           |
|-------------------------------------|
| <input checked="" type="checkbox"/> |
| <input type="checkbox"/>            |
| <input type="checkbox"/>            |
| <input checked="" type="checkbox"/> |
| <input type="checkbox"/>            |

Print overzicht      Email overzicht      Afsluiten

What is helpful for me?

How do I feel?

Progress on my goals

The process of completing the questionnaire and monitoring progress is **supported by expert users**.

## Box - Computerized intervention Cognitive Remediation (CR)

### CIRCuiTS program

'CIRCuits' is a computerized program to provide cognitive remediation training. CIRCuiTS is an abbreviation of 'Computerised Interactive Remediation of Cognition Training for Schizophrenia'. The program is developed by Wykes and colleagues at King's College, and was translated into Dutch for the present study. CIRCuiTS consists of computerized tasks, aimed at the cognitive domains attention, memory and planning.

To foster generalization of new cognitive abilities and strategies to **daily life**, the program is **designed as a village**.

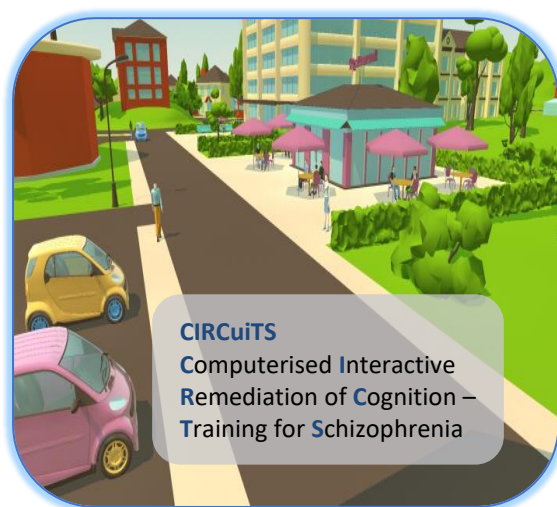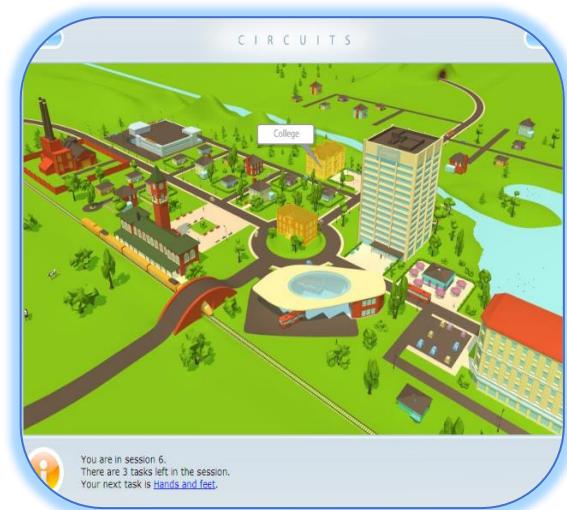

The tasks take place at different locations in this village, such as the supermarket, train station, library, and office, and are designed to train **daily life activities** (e.g. travelling, shopping, agenda planning, remember faces, etc).

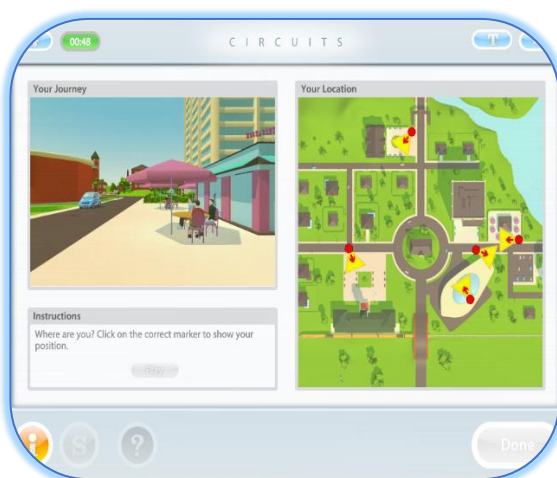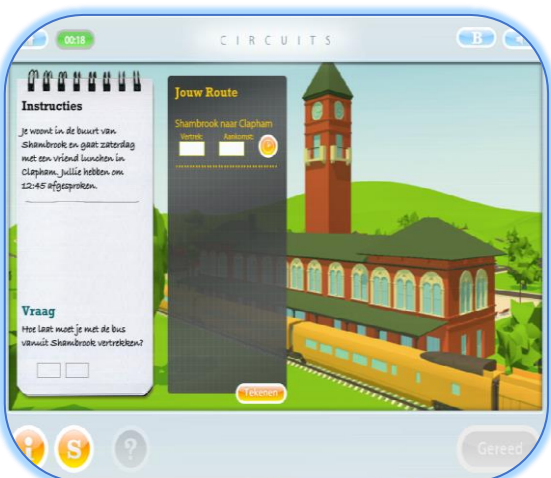

The difficulty of the tasks is **adjusted automatically** to the competence level of the participant.

Implementing evidence-based interventions to improve vocational recovery in early psychosis

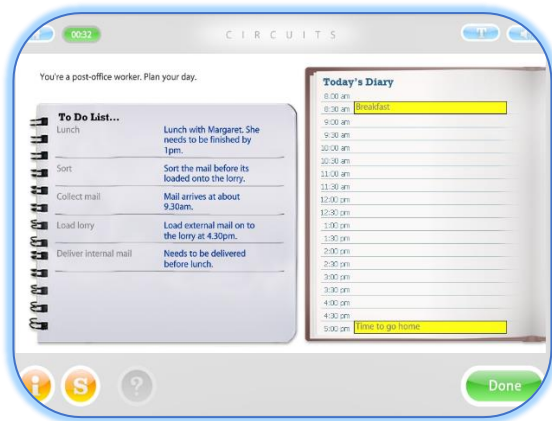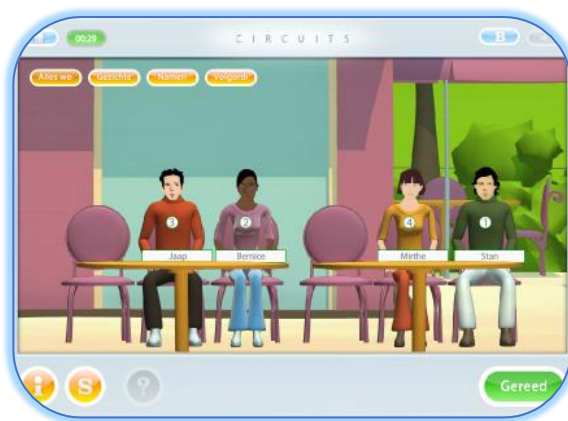

Clients are instructed to formulate **Cog-SMART goals**: goals that are related to cognitive functioning and are specific, measurable, appealing, realistic and time bound. They receive **feedback** on their scores on each tasks.

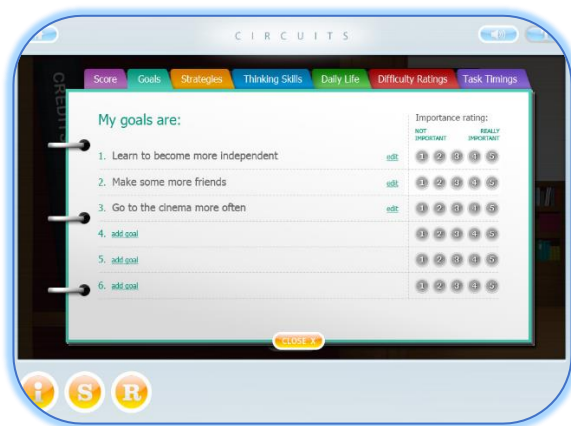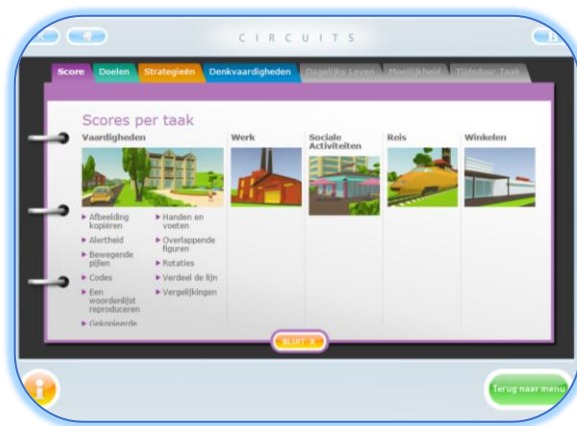

It is a so called **'drill and strategy'** program, aiming to improve cognition not only by repetitive training with many different assignments (drill), but also by learning to **use strategies** and to improve meta-cognition. **Meta-cognition** is trained by stimulating participants to think ahead about the tasks and reflect about their performance afterwards.

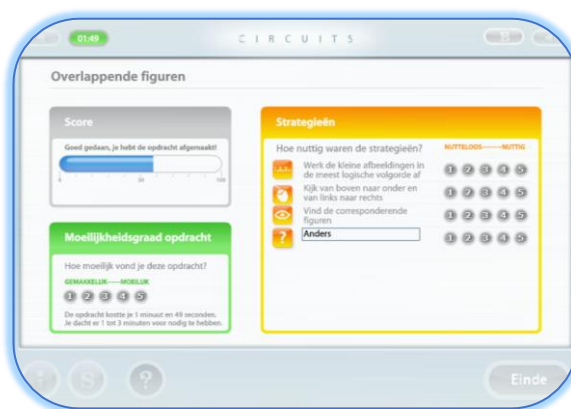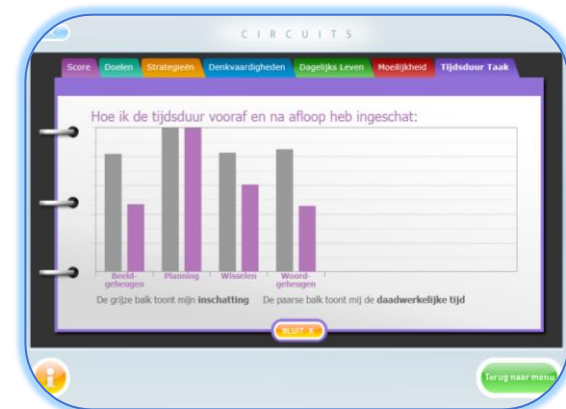

**Trained therapists** support clients working with CIRCuiTs. Their role is to motivate participants, enhance metacognition and foster transfer to real-life functioning. The usual program consists of 40 sessions of 15 to 60 minutes. The program prescribes **three sessions a week**.



**Table. Process of fidelity audits for each intervention**

| <b>Interv.</b> | <b>Fidelity Scale</b>                                                                                              | <b>Process Fidelity Audit</b>                                                                                                                                                                                                                                                                                                                                                         |
|----------------|--------------------------------------------------------------------------------------------------------------------|---------------------------------------------------------------------------------------------------------------------------------------------------------------------------------------------------------------------------------------------------------------------------------------------------------------------------------------------------------------------------------------|
| <b>IPS</b>     | Fidelity assessed at <i>program</i> level with 25-item IPS-Fidelity scale (Bond et al, 2012)                       | <p><i>One-day visit:</i></p> <ul style="list-style-type: none"> <li>• Observation team-meeting treatment team</li> <li>• Observation team-meeting IPS-team</li> <li>• Interview ≥ 2 IPS-specialists</li> <li>• Interview psychiatrist</li> <li>• Interview ≥ 3 other team members</li> <li>• Interviews with clients and family</li> <li>• Inspection of patient dossiers</li> </ul>  |
| <b>CR</b>      | Fidelity ('proxy') assessed at <i>intervention</i> level with 16-item scale developed for the study                | <p><i>Half-day visit:</i></p> <ul style="list-style-type: none"> <li>• Group-interviews CR therapists: items of fidelity scale</li> <li>• Individual-interviews patients: items of fidelity scale</li> </ul> <p><i>Complemented (after the visit) with:</i></p> <ul style="list-style-type: none"> <li>• Information from content-management system of CR computer program</li> </ul> |
| <b>SDM</b>     | Fidelity assessed at <i>intervention</i> level with 9-item SDM, patient- and therapist version (Simon et al, 2006) | <p><i>Half-day visit:</i></p> <ul style="list-style-type: none"> <li>• Clinicians individually completing the SDM scale in writing</li> <li>• Group-interviews with clinicians: reflection on answers</li> <li>• Individual interviews patients: items of SDM scale</li> </ul>                                                                                                        |

## Mean item-scores fidelity scales IPS - CR - SDM at month 10 and month 22

| IPS fidelity-scale (25 items) (scale: 1-5)                                         | M 10 - Mean     |                 | M 22 - Mean |     |
|------------------------------------------------------------------------------------|-----------------|-----------------|-------------|-----|
|                                                                                    | Em <sup>1</sup> | Ed <sup>1</sup> | Em          | Ed  |
| A1. Caseload size of IPS coaches                                                   | 3.8             |                 | 3.8         |     |
| A2. IPS coaches only provide IPS services                                          | 3.8             |                 | 4.1         |     |
| A3. IPS coaches carry out all phases of employment services                        | 3.9             | 4.0             | 4.5         | 4.6 |
| B1. Integration IPS with mental health treatment - team assignment                 | 4.2             |                 | 4.8         |     |
| B2. Integration IPS with mental health treatment - frequent team contact           | 3.8             |                 | 3.8         |     |
| B4. IPS-coach is part of a vocational unit                                         | 2.5             |                 | 2.3         |     |
| B6. Zero exclusion criteria: all patients interested in work/education have access | 4.2             | 4.1             | 4.4         | 4.4 |
| B7. Focus on competitive employment or regular education                           | 2.3             | 2.3             | 3.1         | 3.1 |
| B8. Executives support IPS                                                         | 2.4             |                 | 2.9         |     |
| C1. Income planning (including welfare benefit counseling)                         | 4.2             | 3.8             | 3.5         | 3.6 |
| C2. Support with choices on disclosure                                             | 4.4             | 4.3             | 4.8         | 4.8 |
| C3. Ongoing work-based vocational assessment                                       | 3.6             | 4.2             | 3.6         | 3.0 |
| C4. Rapid job/education search: assessment and contact < 30 days                   | 2.6             | 3.2             | 2.6         | 3.1 |
| C5. Individualized job/educ. search: good match based on patients' preferences     | 4.3             | 4.3             | 4.1         | 4.1 |
| C6. Job/education development - Frequent employer/school contact                   | 2.1             |                 | 2.8         |     |
| C7. Job/education development - Quality of employer contact                        | 2.9             | 3.7             | 3.6         | 2.8 |
| C8. Diversity of job/education types                                               | 4.4             | 4.9             | 4.4         | 5.0 |
| C9. Diversity of employers                                                         | 4.4             |                 | 4.3         |     |
| C10. Provide competitive job options (>65% or >10 jobs)                            | 1.4             |                 | 2.6         |     |
| C11. Individualized follow-along support                                           | 4.1             | 4.2             | 4.3         | 4.3 |
| C12. Time-unlimited follow-along support                                           | 4.4             | 4.9             | 4.1         | 4.1 |
| C13. Community-based service                                                       | 3.4             |                 | 3.3         |     |
| C14. Assertive engagement and outreach by integrated team                          | 4.7             |                 | 4.1         |     |
| CR Fidelity-scale (16 items) (scale: 1-4)                                          | M 10 - Mean     |                 | M 22 - Mean |     |
| A1. Patients enrolled in 40 sessions total                                         | 2.8             |                 | 3.0         |     |
| A2. Three sessions per week (guided plus homework)                                 | 2.3             |                 | 2.6         |     |

|                                                                                   |                         |                        |                    |            |
|-----------------------------------------------------------------------------------|-------------------------|------------------------|--------------------|------------|
| A3. One guided session per week, with support from CR therapist                   | 3.0                     | 3.7                    |                    |            |
| A4. One homework session per week, with assistance by telephone                   | 2.7                     | 2.9                    |                    |            |
| A5. One homework session per week, without help therapist                         | 2.3                     | 3.1                    |                    |            |
| A6. Duration of sessions                                                          | 3.2                     | 3.4                    |                    |            |
| B1. Tailoring of tasks and sessions to match level of patient                     | 2.2                     | 3.0                    |                    |            |
| B2. Explain the rationale for cognitive remediation                               | 3.0                     | 3.4                    |                    |            |
| B3. Motivate patient to follow the program and practice tasks                     | 3.0                     | 3.7                    |                    |            |
| B4. Support patient in learning and evaluating cognitive strategies               | 2.8                     | 3.7                    |                    |            |
| B5. Facilitate meta-cognitive knowledge and skills                                | 2.7                     | 3.1                    |                    |            |
| B6. Stimulate transfer of cognitive skills to daily life                          | 2.3                     | 3.0                    |                    |            |
| C1. Support by trained CR therapist                                               | 3.3                     | 3.7                    |                    |            |
| C2. Support patient in formulating cog-SMART goals                                | 2.3                     | 3.1                    |                    |            |
| C3. Provide clear homework instruction (tasks, strategy, transfer to real-life)   | 1.8                     | 2.9                    |                    |            |
| C4. Discuss homework completion (tasks, strategy, transfer to real-life)          | 2.5                     | 3.0                    |                    |            |
| <b>SDM fidelity-scale (9 items) (scale: 1-6)</b>                                  | <b>M 10 - Mean</b>      |                        | <b>M 22 - Mean</b> |            |
|                                                                                   | <b>Ther<sup>2</sup></b> | <b>Ptn<sup>2</sup></b> | <b>Ther</b>        | <b>Ptn</b> |
| 1. Therapist makes clear to patient a decision needs to be made                   | 4.7                     | 4.7                    | 4.8                | 3.3        |
| 2. Therapist asks how patient wants to be involved in making decision             | 4.4                     | 3.6                    | 4.0                | 5.0        |
| 3. Therapist explains there are different treatment options                       | 5.4                     | 4.1                    | 4.6                | 4.7        |
| 4. Therapist precisely explains advantages and disadvantages of treatment options | 5.3                     | 3.9                    | 5.0                | 5.3        |
| 5. Therapist checks if the patient has understood all the information             | 4.9                     | 4.1                    | 5.2                | 5.3        |
| 6. Therapist asks patient which treatment option he prefers                       | 5.3                     | 4.4                    | 5.0                | 4.7        |
| 7. Therapist and patient thoroughly weigh different treatment options             | 4.0                     | 4.2                    | 5.2                | 5.3        |
| 8. Therapist and patient select a treatment option together                       | 4.8                     | 4.3                    | 5.0                | 5.0        |
| 9. Therapist and patient reach an agreement on how to proceed                     | 5.5                     | 4.6                    | 5.3                | 5.0        |

<sup>1.</sup> When it was possible to assess a separate score for IPS-Employment and IPS-Education; two scores are presented (IPS-Em / IPS-Ed).

<sup>2.</sup> Separate fidelity-scores were assessed for therapists (ther) and patients (ptn).
